# Supplementary material
Source: PubMed Central journal article supplement (PMC3647975)
Supplement: MCB.00038-13_zmb999109962so1.pdf [file MCB.00038-13_zmb999109962so1.pdf]

## Supplemental Material

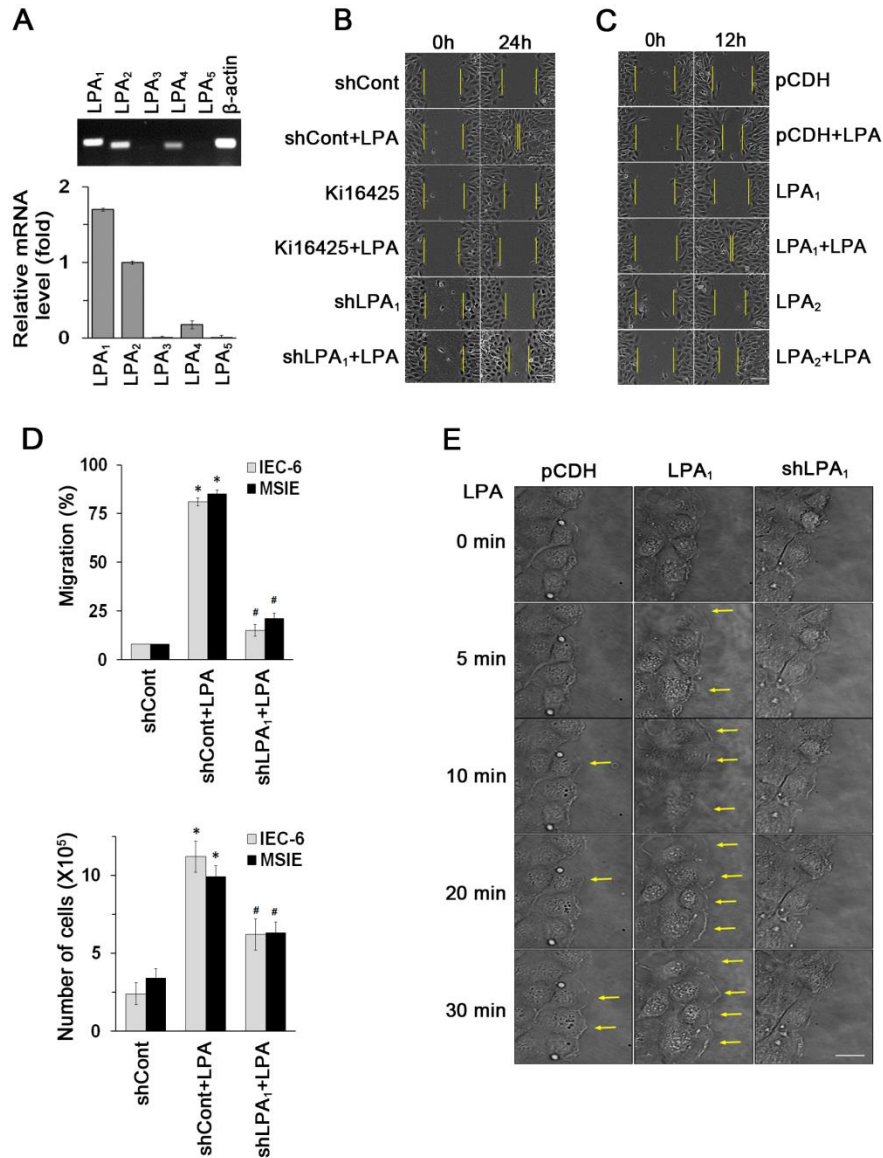

**Fig. S1. LPA<sub>1</sub> mediates migration of IECs.** (A) Expressions of LPA receptor in YAMC cells were determined by RT-PCR (top) and quantified by real-time RT-PCR (bottom).  $n = 3$ . (B) Migration of YAMC cells into the nude area at 24 h of 1  $\mu$ M LPA treatment is shown. Cells were pretreated with 10  $\mu$ M Ki16425 or transfected with shLPA<sub>1</sub> prior to LPA treatment. Scale bars, 20 $\mu$ m.  $n = 3$ . (C) Migration of YAMC cells overexpressing LPA<sub>1</sub> or LPA<sub>2</sub> was determined. Scale bars, 20 $\mu$ m.  $n = 3$ . (D) Migration of IEC-6 or MSIE cells during 24 h of LPA treatment is shown (top panel). Numbers of proliferating IEC-6 or MSIE cells at day 3 were determined (bottom panel). \*,  $P < 0.01$ . #,  $P < 0.01$ . (E) The appearance of lamellipodial extrusion in YAMC cells transfected with pCDH, LPA<sub>1</sub>, or shLPA<sub>1</sub> were captured by time-lapse video microscopy for 30 min. Representative sequential images are shown. Arrows indicate lamellipodia.  $n = 3$ . Scale bars, 20 $\mu$ m.

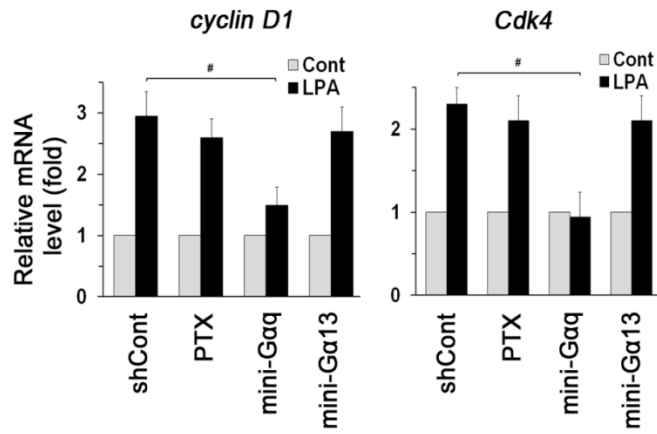

**Fig. S2. Gαq regulates expression of cell cycle-related cyclin D1 and Cdk4.** Expression levels of cyclin D1 and Cdk4 were determined by real-time RT-PCR. Cells are treated with PTX or transfected with minigene as indicated.  $n = 3$ . #,  $P < 0.01$ .

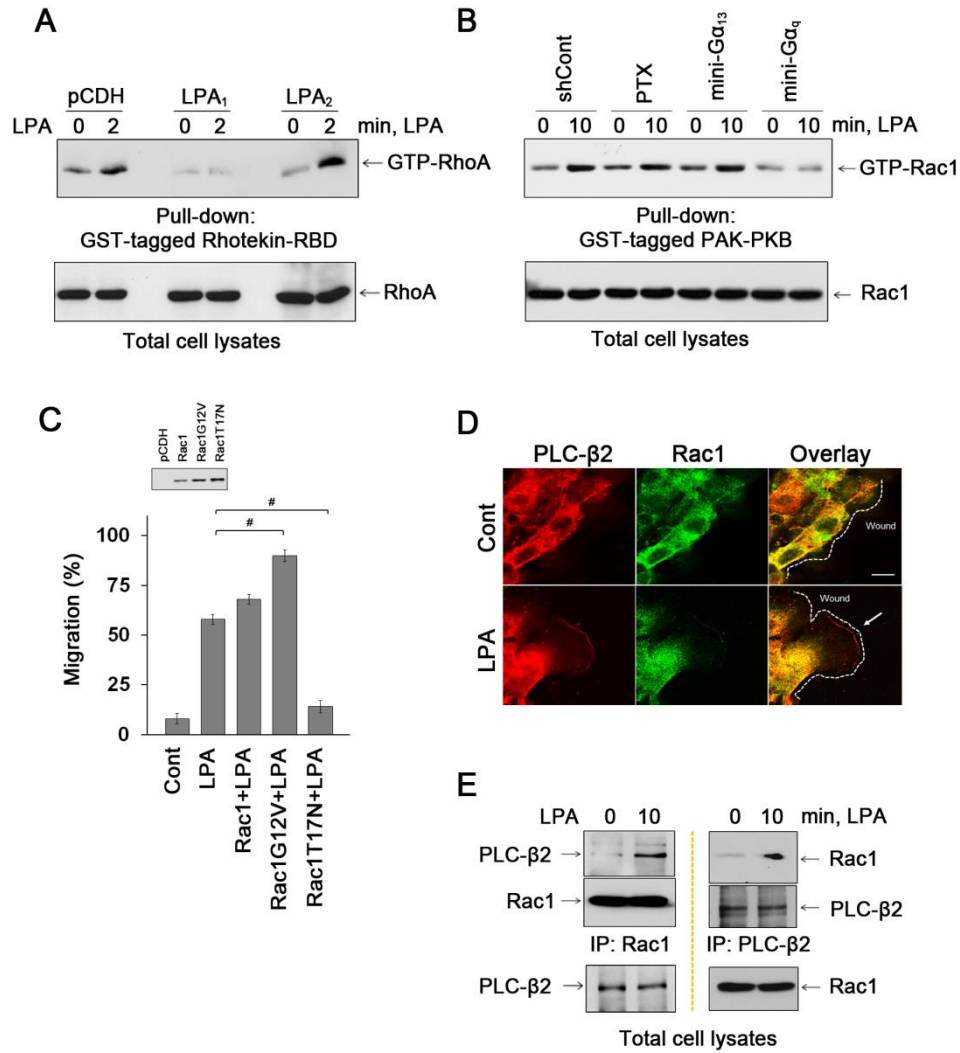

**Fig. S3. Rac1 mediates LPA<sub>1</sub>-induced cell migration.** (A) Activation of RhoA in YAMC cells transfected with LPA<sub>1</sub> or LPA<sub>2</sub> was detected by GST-rhotekin RBD pull-down. Bottom panel shows RhoA in cell lysates.  $n = 3$ . (B) Rac1 activation was determined in YAMC cells pre-treated with PTX or transfected with minigene of Gα<sub>q</sub> or Gα<sub>13</sub>. Bottom panel shows Rac1 in cell lysates.  $n = 3$ . (C) Migration of YAMC cells transfected with Rac1, Rac1G12V, and Rac1T17N was determined.  $n = 3$ . #,  $P < 0.01$ . The inset shows expression of exogenous Rac1, Rac1G12V, and Rac1T17N in YAMC cells. (D) Co-localization of PLC-β2 (red) and Rac1 (green) at lamellipodia determined by immunofluorescence confocal microscopy. Arrow indicates lamellipodia. Outlined dash indicates leading edge. Scale bars, 20μm. (E) Cell lysates were immunoprecipitated with anti-Rac1 or anti-PLC-β2 antibody. Co-immunoprecipitated PLC-β2 (left) and Rac1 (right) was detected by Western blot. The bottom panels show expression of PLC-β2 and Rac1.  $n = 3$ .

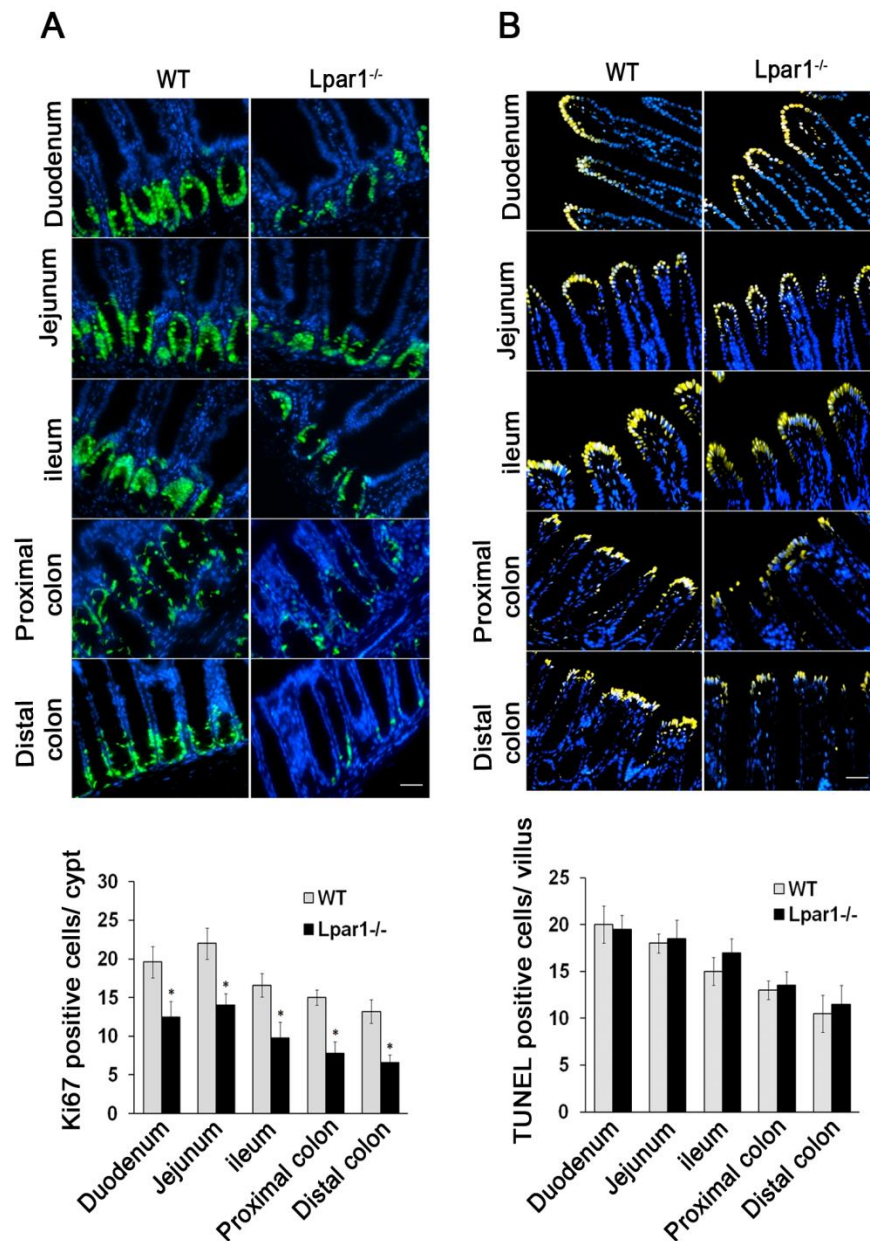

**Fig. S4. Cell proliferation but not apoptosis is altered in *Lpar1*<sup>-/-</sup> mice.** (A) Proliferating IECs in WT and *Lpar1*<sup>-/-</sup> intestine were immunolabeled using anti-Ki67 antibody (green). *n* = 6. DAPI was used for nuclear counterstaining (blue). Scale bars, 50 $\mu$ m. \*, *P* < 0.01 versus WT. Numbers of proliferation cells are quantified in the graph below, (B) The apoptotic cells (yellow) in paraffin embedded sections were detected by TUNEL assay using an apoptosis detection kit according to manufacturer's instructions (R&D Systems). Quantification of TUNEL-positive cells is shown below.

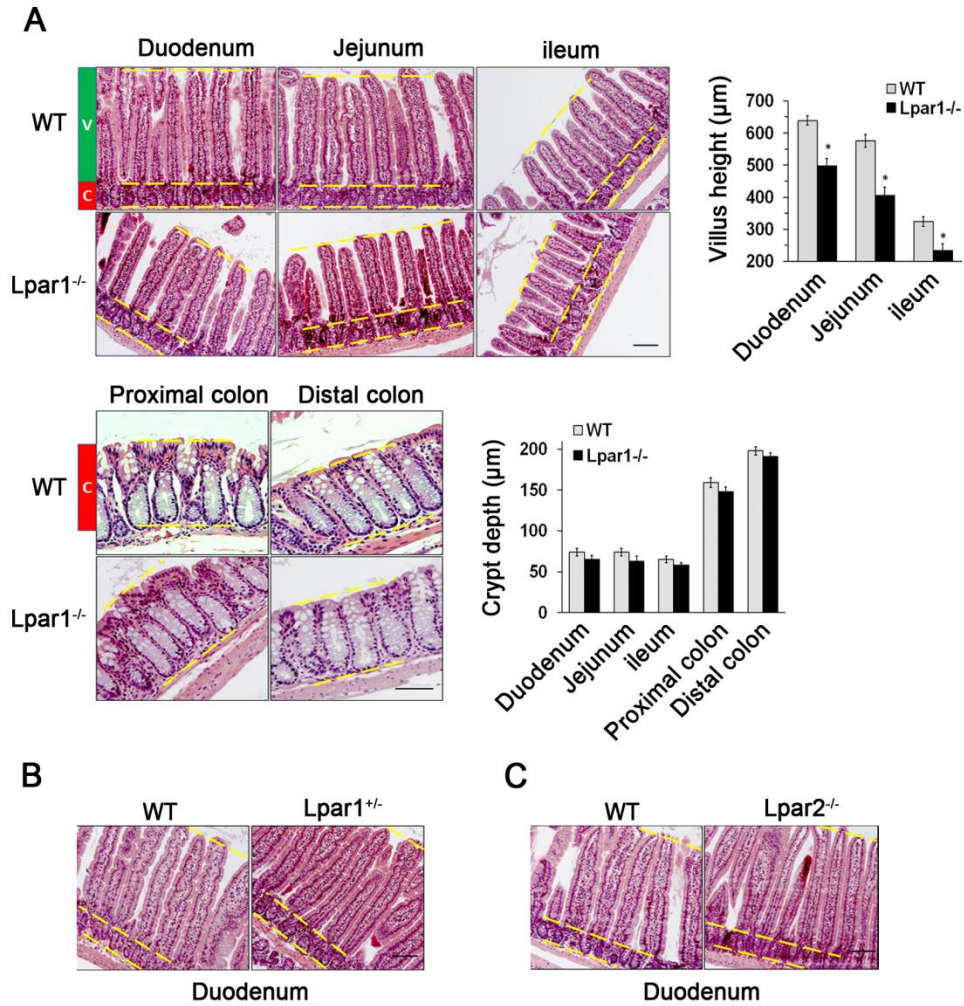

**Fig. S5. *Lpar1*<sup>-/-</sup> mice display shortened villi.** (A) Representative intestinal and colonic tissues stained with H&E are shown. Dash lines mark villus (v) and crypt (c). Graphs show quantification of villous height and crypt depth.  $n = 6$  per group. Scale bars, 100µm. \*,  $P < 0.01$  versus WT. The intestinal epithelial structures are not altered in *Lpar1*<sup>+/-</sup> (B) and *Lpar2*<sup>-/-</sup> (C) mice.  $n = 6$ . Scale bars, 100µm.
